# Supplementary material
Source: Research Square preprint supplement (doi:10.21203/rs.3.rs-9260490/v1)
Supplement: Supplementary file 1 [file d92c4fb07cd6f002176f7d05.docx]

**Supplementary MATERIALS**

**End-to-End Reliability of Automated Systems for Diagnostic Evidence Extraction: A Prospective Benchmark Study**

Anton Kravchuk1, Julio Ruben Rodas Garzaro1, Gregor Donabauer2, Samy Ateia2, Udo Kruschwitz2, Valentin Egert3, Christoph Eckl3, Emily Rinderknecht3,4, Stefanie Herrmann1, Stephan Siepmann1, Maximilian Burger3, Christian Gilfrich1, Maximilian Haas3#, and Matthias May1#

1 - Department of Urology, St. Elisabeth Hospital Straubing, Medical Campus Lower Bavaria (MCN), Straubing, Germany; 2 - Information Science, University of Regensburg, Regensburg, Germany; 3 - Department of Urology, Caritas St. Josef Medical Center, University of Regensburg, Regensburg, Germany; 4 - Department of Urology, University of Augsburg, Augsburg, Germany

*#These authors contributed equally as senior authors*

**Correspondence to:** Dr. Maximilian Haas; Department of Urology, Caritas St. Josef Medical Center, University of Regensburg, Regensburg, Germany

email: [mhaas@csj.de](mailto:mhaas@csj.de)

**Prompt development, locking, and exploratory optimization**

Prompting was handled in two analytically distinct phases. For the confirmatory benchmark, a single locked prompt was developed for use across all evaluated systems. Its purpose was to operationalize a conservative extraction framework that prioritized comparability, reproducibility, and protection against unsupported numeric completion. Systems were instructed to rely only on explicitly reported absolute counts and to classify an entire dataset as non-derivable if any cell of the corresponding 2 × 2 contingency table could not be established with certainty from the source document. This design was chosen because, in diagnostic evidence synthesis, unsupported completion of apparently plausible cell counts is methodologically more problematic than explicit abstention. Incorrect contingency-table cells may directly distort downstream diagnostic metrics and can be difficult to detect without manual verification. The locked primary prompt was refined iteratively within the study team, fixed before system execution, and applied uniformly across all systems without model-specific adaptation.

A separate exploratory prompt was developed to examine performance under less restrictive but still explicitly documented conditions. In contrast to the locked primary prompt, this supplementary prompt permitted limited rule-based reconstruction when the source document contained sufficient explicit information to justify recovery of a complete 2 × 2 contingency table under predefined constraints. Its development involved iterative refinement, including few-shot prompt design, but the final wording was fixed before execution and then applied uniformly across all evaluated systems. The study corpus, benchmark definitions, derivability framework, and evaluation rules remained unchanged. These exploratory analyses were not part of the confirmatory primary endpoint analysis and should be interpreted only as supplementary contextualization of upper-bound extraction performance under a more permissive shared prompting framework. The final wording of both prompts is provided below.

**Locked primary-analysis prompt**

***Uromonitor:*** What are the false-positive, false-negative, true-positive, and true-negative test results of the Uromonitor assay for the detection of bladder cancer? Use only explicitly reported absolute numbers. Do not reconstruct values from sensitivity, specificity, positive predictive value, negative predictive value, or prevalence unless all required components are explicitly stated. If any cell of the 2 × 2 contingency table cannot be determined with certainty, output “Not derivable” for the entire table.

***Urine cytology:*** What are the false-positive, false-negative, true-positive, and true-negative test results of urine cytology for the detection of bladder cancer? Use only explicitly reported absolute numbers. Do not reconstruct values from sensitivity, specificity, positive predictive value, negative predictive value, or prevalence unless all required components are explicitly stated. If any cell of the 2 × 2 contingency table cannot be determined with certainty, output “Not derivable” for the entire table.

**Final shared exploratory prompt used in supplementary runs**

Extract patient-level true positives (TP), false positives (FP), false negatives (FN), and true negatives (TN) for Uromonitor and urine cytology against the reference standard reported in the paper, using only the provided document. Maximize extraction yield, but do not infer or invent unsupported numbers. If any cell cannot be supported by explicit text, tabulated data, or exact arithmetic based on explicitly reported denominators, output “Not derivable” for that test.

Apply the following rules.

1. *Unit of analysis*

Treat each cohort, phase, population, or time point as a separate dataset if the paper reports them separately. Prefer per-patient results unless the primary diagnostic performance analysis is explicitly reported on a per-sample basis. Uromonitor and urine cytology may have different denominators; preserve test-specific denominators where applicable.

1. *Direct extraction*

If a complete 2 × 2 contingency table is reported directly, extract the values as stated.

1. *Reconstruction from explicit fractions*

If sensitivity is reported as a fraction a/b, set TP = a and FN = b - a.
If specificity is reported as a fraction c/d, set TN = c and FP = d - c.

1. *Reconstruction from percentages with explicit denominators*

If sensitivity and specificity are reported as percentages and the corresponding numbers of diseased and non-diseased patients are explicitly reported for the same analysis set, calculate:

TP = round(sensitivity × N_pos)

FN = N_pos – TP

TN = round(specificity × N_neg)

FP = N_neg – TN

Minor adjustment of TP or TN by ±1 was permitted only when necessary to improve agreement with the explicitly reported percentages for the same analysis set.

1. *Use of prevalence*

If N_pos and N_neg are not reported directly, but total sample size and prevalence are explicitly reported for the same analysis set, calculate:

N_pos = round(prevalence × N_total)

N_neg = N_total - N_pos

If these conditions are not met, classify the dataset as not derivable.

1. *Enumeration step*

If N_pos and N_neg are known, but the 2 × 2 table remains unresolved, enumerate all feasible combinations of TP and TN, with FN = N_pos - TP and FP = N_neg - TN.

Select the single best-fitting solution by minimizing error in sensitivity and specificity, then positive predictive value and negative predictive value if reported, while enforcing consistency with all explicit numerators and denominators in the source document. If ties remain and differ materially in TP or TN, classify the dataset as not derivable.

1. *Validity constraints*

If N_pos is known, TP + FN must equal N_pos exactly.

If N_neg is known, TN + FP must equal N_neg exactly.

If both are known, the complete table must be internally consistent without residual discrepancy. Exact fractions reported in the source document must be matched exactly.

1. *Tolerance rule for percentage-based reconstruction*

When reconstruction is based on percentages, allow a denominator-aware tolerance of no more than max(3%, 100% / N_pos) for sensitivity and max(3%, 100% / N_neg) for specificity.

1. *Output format*

Output only the dataset label, source location, denominator notes if relevant, and either a complete 2 × 2 table or “Not derivable” for the respective test.

Use the following structure:

Dataset: <label> [Source: Table/Figure/Supplement/Page]

Uromonitor: TP = ..., FP = ..., FN = ..., TN = ...

*or*
Uromonitor: Not derivable

Urine cytology: TP = ..., FP = ..., FN = ..., TN = ...

*or*
Urine cytology: Not derivable

**Supplementary Tables**

**Supplementary Tables S1. Cell-level correctness across derivable datasets**

**Table S1a-i. Per-dataset overview — all automated systems**

| **Dataset** | **MedNuggetizer** | | **ChatGPT-5.2** | | **Claude Opus 4.5** | | **Gemini 3 Pro** | |
| --- | --- | --- | --- | --- | --- | --- | --- | --- |
|  | **All-cell-correct runs / 20** | **Cell-level exact-match rate, %** | **All-cell-correct runs / 20** | **Cell-level exact-match rate, %** | **All-cell-correct runs / 20** | **Cell-level exact-match rate, %** | **All-cell-correct runs / 20** | **Cell-level exact-match rate, %** |
| **Batista[13] — Uromonitor** | 19/20 | 95% | 18/20 | 91% | 17/20 | 89% | 16/20 | 85% |
| **Batista[13] — Cytology** | 17/20 | 86% | 18/20 | 91% | 20/20 | 100% | 7/20 | 41% |
| **Sieverink[14] — Uromonitor** | 20/20 | 100% | 20/20 | 100% | 17/20 | 85% | 20/20 | 100% |
| **Sieverink[14] — Cytology** | 20/20 | 100% | 19/20 | 95% | 20/20 | 100% | 20/20 | 100% |
| **Rabien[16] — Uromonitor** | 20/20 | 100% | 20/20 | 100% | 20/20 | 100% | 20/20 | 100% |
| **Rabien[16] — Cytology** | 20/20 | 100% | 20/20 | 100% | 20/20 | 100% | 20/20 | 100% |
| **Wolff[17] — Uromonitor** | 20/20 | 100% | 20/20 | 100% | 20/20 | 100% | 20/20 | 100% |
| **Wolff[17] — Cytology** | 20/20 | 100% | 19/20 | 95% | 20/20 | 100% | 18/20 | 90% |
| **Ramos[19] — Uromonitor** | 20/20 | 100% | 20/20 | 100% | 20/20 | 100% | 20/20 | 100% |
| **Ramos[19] — Cytology** | 18/20 | 90% | 20/20 | 100% | 20/20 | 100% | 20/20 | 100% |
| **Azawi[20] — Uromonitor** | 19/20 | 95% | 14/20 | 70% | 20/20 | 100% | 20/20 | 100% |
| **TOTAL** | **213/220** | 96.9% | **208/220** | 94.8% | **214/220** | 97.6% | **201/220** | 92.4% |

**Note:** This table summarizes per-dataset cell-level extraction correctness across the 11 benchmark-derivable datasets for all four automated systems. Each system was evaluated across 20 repeated runs, yielding 880 cell-level observations per system (11 datasets × 4 cells × 20 runs). A cell was scored as correct if the extracted integer exactly matched the adjudicated human benchmark. All-cell-correct runs denote runs in which all four contingency-table cells (TP, FP, FN, TN) were simultaneously correct, equivalent to run-level correctness on derivable datasets. Cell-level exact-match rates were calculated as the proportion of individually correct cells out of the maximum possible per dataset (4 cells × 20 runs = 80).

**Abbreviations:** FN, false negatives; FP, false positives; TN, true negatives; TP, true positives

**Table S1a-ii. Cross-system summary**

| **System** | **Correct cells / 880** | **overall exact-match rate, %** | **All-cell-correct runs / 220** | **Cell-level exact-match rate, %** | **Max metric deviation** |
| --- | --- | --- | --- | --- | --- |
| **MedNuggetizer** | 853/880 | 96.93% | 213/220 | 96.8% | 25.0 pp |
| **ChatGPT-5.2** | 834/880 | 94.77% | 208/220 | 94.5% | 25.0 pp |
| **Claude Opus 4.5** | 859/880 | 97.61% | 214/220 | 97.3% | 10.6 pp |
| **Gemini 3 Pro** | 813/880 | 92.39% | 201/220 | 91.4% | 25.0 pp |

**Note:** Cross-system summary of cell-level extraction performance on derivable datasets. Each system contributed 880 cell-level observations and 220 possible all-cell-correct runs (11 datasets × 20 runs). Maximum metric deviation denotes the largest absolute deviation in any derived diagnostic metric across all runs and derivable datasets relative to the benchmark-derived value.

**Abbreviations:** pp, percentage points

**Table S1b. Per-system cell breakdown - correct extractions per cell type (out of 20 runs)**

| | **MedNuggetizer** | **TP /20** | **FP /20** | **TN /20** | **FN /20** | **All /20** | | --- | --- | --- | --- | --- | --- | | **Batista [13] — Uromonitor** | 19 | 19 | 19 | 19 | 19 | | **Batista [13] — Cytology** | 18 | 17 | 17 | 17 | 17 | | **Sieverink [14] — Uromonitor** | 20 | 20 | 20 | 20 | **20** | | **Sieverink [14] — Cytology** | 20 | 20 | 20 | 20 | **20** | | **Rabien [16] — Uromonitor** | 20 | 20 | 20 | 20 | **20** | | **Rabien [16] — Cytology** | 20 | 20 | 20 | 20 | **20** | | **Wolff[17] — Uromonitor** | 20 | 20 | 20 | 20 | **20** | | **Wolff[17] — Cytology** | 20 | 20 | 20 | 20 | **20** | | **Ramos[19] — Uromonitor** | 20 | 20 | 20 | 20 | **20** | | **Ramos[19] — Cytology** | 18 | 18 | 18 | 18 | 18 | | **Azawi[20] — Uromonitor** | 19 | 19 | 19 | 19 | 19 | |  | | **ChatGPT-5.2** | **TP /20** | **FP /20** | **TN /20** | **FN /20** | **All /20** | | --- | --- | --- | --- | --- | --- | | **Batista [13] — Uromonitor** | 18 | 19 | 18 | 18 | 18 | | **Batista [13] — Cytology** | 19 | 18 | 18 | 18 | 18 | | **Sieverink [14] — Uromonitor** | 20 | 20 | 20 | 20 | **20** | | **Sieverink [14] — Cytology** | 19 | 19 | 19 | 19 | 19 | | **Rabien [16] — Uromonitor** | 20 | 20 | 20 | 20 | **20** | | **Rabien [16] — Cytology** | 20 | 20 | 20 | 20 | **20** | | **Wolff[17] — Uromonitor** | 20 | 20 | 20 | 20 | **20** | | **Wolff[17] — Cytology** | 19 | 19 | 19 | 19 | 19 | | **Ramos[19] — Uromonitor** | 20 | 20 | 20 | 20 | **20** | | **Ramos[19] — Cytology** | 20 | 20 | 20 | 20 | **20** | | **Azawi[20] — Uromonitor** | 14 | 14 | 14 | 14 | 14 | |
| --- | --- | --- | --- | --- | --- | --- | --- | --- | --- | --- | --- | --- | --- | --- | --- | --- | --- | --- | --- | --- | --- | --- | --- | --- | --- | --- | --- | --- | --- | --- | --- | --- | --- | --- | --- | --- | --- | --- | --- | --- | --- | --- | --- | --- | --- | --- | --- | --- | --- | --- | --- | --- | --- | --- | --- | --- | --- | --- | --- | --- | --- | --- | --- | --- | --- | --- | --- | --- | --- | --- | --- | --- | --- | --- | --- | --- | --- | --- | --- | --- | --- | --- | --- | --- | --- | --- | --- | --- | --- | --- | --- | --- | --- | --- | --- | --- | --- | --- | --- | --- | --- | --- | --- | --- | --- | --- | --- | --- | --- | --- | --- | --- | --- | --- | --- | --- | --- | --- | --- | --- | --- | --- | --- | --- | --- | --- | --- | --- | --- | --- | --- | --- | --- | --- | --- | --- | --- | --- | --- | --- | --- | --- | --- | --- | --- | --- |
| | **Claude Opus 4.5** | **TP /20** | **FP /20** | **TN /20** | **FN /20** | **All /20** | | --- | --- | --- | --- | --- | --- | | **Batista [13] — Uromonitor** | 17 | 20 | 17 | 17 | 17 | | **Batista [13] — Cytology** | 20 | 20 | 20 | 20 | **20** | | **Sieverink [14] — Uromonitor** | 17 | 17 | 17 | 17 | 17 | | **Sieverink [14] — Cytology** | 20 | 20 | 20 | 20 | **20** | | **Rabien [16] — Uromonitor** | 20 | 20 | 20 | 20 | **20** | | **Rabien [16] — Cytology** | 20 | 20 | 20 | 20 | **20** | | **Wolff[17] — Uromonitor** | 20 | 20 | 20 | 20 | **20** | | **Wolff[17] — Cytology** | 20 | 20 | 20 | 20 | **20** | | **Ramos[19] — Uromonitor** | 20 | 20 | 20 | 20 | **20** | | **Ramos[19] — Cytology** | 20 | 20 | 20 | 20 | **20** | | **Azawi[20] — Uromonitor** | 20 | 20 | 20 | 20 | **20** | |  | | **Gemini 3 Pro** | **TP /20** | **FP /20** | **TN /20** | **FN /20** | **All /20** | | --- | --- | --- | --- | --- | --- | | **Batista [13] — Uromonitor** | 16 | 20 | 16 | 16 | 16 | | **Batista [13] — Cytology** | 12 | 7 | 7 | 7 | 7 | | **Sieverink [14] — Uromonitor** | 20 | 20 | 20 | 20 | **20** | | **Sieverink [14] — Cytology** | 20 | 20 | 20 | 20 | **20** | | **Rabien [16] — Uromonitor** | 20 | 20 | 20 | 20 | **20** | | **Rabien [16] — Cytology** | 20 | 20 | 20 | 20 | **20** | | **Wolff[17] — Uromonitor** | 20 | 20 | 20 | 20 | **20** | | **Wolff[17] — Cytology** | 18 | 18 | 18 | 18 | 18 | | **Ramos[19] — Uromonitor** | 20 | 20 | 20 | 20 | **20** | | **Ramos[19] — Cytology** | 20 | 20 | 20 | 20 | **20** | | **Azawi[20] — Uromonitor** | 20 | 20 | 20 | 20 | **20** | |

**Note:** Per-cell-type extraction correctness for each automated system across the 11 benchmark-derivable datasets. Each value denotes the number of runs, out of 20, in which the respective cell exactly matched the adjudicated human benchmark. The column “All / 20” denotes runs in which all four contingency-table cells were simultaneously correct.

**Abbreviations**: FN, false negatives; FP, false positives; TN, true negatives; TP, true positives

**Supplementary Tables S2. Hallucination taxonomy on non-derivable datasets**

**Table S2a. Hallucination events across benchmark-defined non-derivable datasets**

| **System** | **Dataset 3.1** | **Dataset 3.2** | **Dataset 6.1** | **Dataset 6.2** | **Dataset 8.2** | **Total hallucinations** |
| --- | --- | --- | --- | --- | --- | --- |
| **MedNuggetizer** | 0/20 | 0/20 | 0/20 | 0/20 | 0/20 | **0/100** |
| **ChatGPT-5.2** | 0/20 | 0/20 | 0/20 | 0/20 | 0/20 | **0/100** |
| **Claude Opus 4.5** | 0/20 | 0/20 | 1/20 | 0/20 | 0/20 | **1/100** |
| **Gemini 3 Pro** | 0/20 | 0/20 | 0/20 | 0/20 | 0/20 | **0/100** |

**Note:** This table summarizes hallucination events across the 5 benchmark-defined non-derivable datasets arising from 3 sentinel publications. A hallucination event was defined as any numeric contingency-table output on a dataset for which the correct benchmark behavior was explicit abstention. Values denote the number of hallucination events out of the total runs per dataset. All pairwise between-system comparisons were non-significant (Fisher’s exact test, p = 1.000 for all pairs). Dataset IDs correspond to Table 1.

**Abbreviations:** n, number of hallucination events; N, total non-derivable dataset-runs

**Table S2b. Event-level taxonomy of hallucination events on non-derivable datasets**

| **System** | **Hallucination events, n/N** | **Affected dataset (run)** | **Outcome classification** |
| --- | --- | --- | --- |
| **MedNuggetizer** | 0/100 | — | Correct abstention |
| **ChatGPT-5.2** | 0/100 | — | Correct abstention |
| **Claude Opus 4.5** | 1/100 | 6.1 (run 12) | Hallucination |
| **Gemini 3 Pro** | 0/100 | — | Correct abstention |

**Note:** This table documents the single hallucination event observed across all evaluated systems and all non-derivable dataset-runs. Claude Opus 4.5 produced a numeric contingency-table output in run 12 on dataset 6.1 (Uromonitor, benchmark-defined non-derivable) instead of declaring non-derivability. MedNuggetizer, ChatGPT-5.2, and Gemini 3 Pro correctly abstained in all 100 non-derivable dataset-runs each, with no hallucination events observed. Dataset IDs correspond to Table 1.

**Abbreviations:** n, number of hallucination events; N, total non-derivable dataset-runs

**Supplementary Tables S3. Repeatability across repeated runs**

**Table S3a. Gwet’s AC1 summary — all systems**

| **System** | **Gwet’s AC1** | **95% CI** | **% Agreement** | **N raters** | **N datasets** |
| --- | --- | --- | --- | --- | --- |
| **MedNuggetizer** | 0.952 | 0.898–0.994 | 95.4 | 20 runs | 16 |
| **ChatGPT-5.2** | 0.931 | 0.847–0.987 | 93.6 | 20 runs | 16 |
| **Claude Opus 4.5** | 0.958 | 0.900–1.000 | 96.0 | 20 runs | 16 |
| **Gemini 3 Pro** | 0.929 | 0.817–1.000 | 93.7 | 20 runs | 16 |
| **Human extraction** | 0.608 | 0.319–0.876 | 79.2 | 4 operators | 16 |

**Note:** This table summarizes within-system repeatability across all evaluated automated systems. Repeatability was assessed across 20 repeated runs per system, with each run comprising all 16 diagnostic datasets. Agreement across runs was quantified using Gwet’s AC1 coefficient with 95% confidence intervals on the basis of the prespecified three-category outcome space of correct numeric extraction, correct abstention, and incorrect or unsafe output. Human extraction reflects inter-operator agreement among 4 independent clinical raters, each extracting all 16 datasets once without adjudication, and is shown for contextual comparison only.

**Abbreviations:** AC1, Gwet’s AC1 coefficient; CI, confidence interval

| **Dataset** | **Derivability** | | **R1** | **R2** | | **R3** | | **R4** | | **R5** | | **R6** | | **R7** | | **R8** | | **R9** | | **R 10** | | **R 11** | | **R 12** | | **R 13** | | **R 14** | | **R 15** | | **R 16** | | **R 17** | | **R 18** | | **R 19** | | **R 20** | | **n/N** | |
| --- | --- | --- | --- | --- | --- | --- | --- | --- | --- | --- | --- | --- | --- | --- | --- | --- | --- | --- | --- | --- | --- | --- | --- | --- | --- | --- | --- | --- | --- | --- | --- | --- | --- | --- | --- | --- | --- | --- | --- | --- | --- | --- | --- |
| **1.1** | | D | v | | v | | v | | v | | v | | v | | v | | v | | v | | v | | v | | v | | v | | v | | v | | v | | v | | X | | v | | v | | 19/20 | |
| **1.2** | | D | v | | v | | v | | v | | v | | v | | v | | v | | X | | v | | v | | v | | v | | v | | v | | v | | v | | v | | X | | X | | 17/20 | |
| **2.1** | | D | v | | v | | v | | v | | v | | v | | v | | v | | v | | v | | v | | v | | v | | v | | v | | v | | v | | v | | v | | v | | 20/20 | |
| **2.2** | | D | v | | v | | v | | v | | v | | v | | v | | v | | v | | v | | v | | v | | v | | v | | v | | v | | v | | v | | v | | v | | 20/20 | |
| **3.1** | | ND | v | | v | | v | | v | | v | | v | | v | | v | | v | | v | | v | | v | | v | | v | | v | | v | | v | | v | | v | | v | | 20/20 | |
| **3.2** | | ND | v | | v | | v | | v | | v | | v | | v | | v | | v | | v | | v | | v | | v | | v | | v | | v | | v | | v | | v | | v | | 20/20 | |
| **4.1** | | D | v | | v | | v | | v | | v | | v | | v | | v | | v | | v | | v | | v | | v | | v | | v | | v | | v | | v | | v | | v | | 20/20 | |
| **4.2** | | D | v | | v | | v | | v | | v | | v | | v | | v | | v | | v | | v | | v | | v | | v | | v | | v | | v | | v | | v | | v | | 20/20 | |
| **5.1** | | D | v | | v | | v | | v | | v | | v | | v | | v | | v | | v | | v | | v | | v | | v | | v | | v | | v | | v | | v | | v | | 20/20 | |
| **5.2** | | D | v | | v | | v | | v | | v | | v | | v | | v | | v | | v | | v | | v | | v | | v | | v | | v | | v | | v | | v | | v | | 20/20 | |
| **6.1** | | ND | v | | v | | v | | v | | v | | v | | v | | v | | v | | v | | v | | v | | v | | v | | v | | v | | v | | v | | v | | v | | 20/20 | |
| **6.2** | | ND | v | | v | | v | | v | | v | | v | | v | | v | | v | | v | | v | | v | | v | | v | | v | | v | | v | | v | | v | | v | | 20/20 | |
| **7.1** | | D | v | | v | | v | | v | | v | | v | | v | | v | | v | | v | | v | | v | | v | | v | | v | | v | | v | | v | | v | | v | | 20/20 | |
| **7.2** | | D | v | | v | | X | | v | | v | | v | | v | | v | | v | | v | | v | | v | | v | | v | | v | | v | | v | | X | | X | | v | | 17/20 | |
| **8.1** | | D | v | | v | | v | | v | | v | | v | | v | | v | | v | | v | | v | | v | | v | | v | | v | | v | | v | | v | | X | | v | | 19/20 | |
| **8.2** | | ND | v | | v | | v | | v | | v | | v | | v | | v | | v | | v | | v | | v | | v | | v | | v | | v | | v | | v | | v | | v | | 20/20 | |

**Table S3b. MedNuggetizer — run-by-run correctness matrix**

**Note:** This table presents run-by-run correctness for MedNuggetizer across 20 repeated runs on the full 16-dataset corpus. Each cell denotes run-level correctness, where v indicates a correct result and X an incorrect result. Correctness definitions are identical to those in Table S3b. Overall repeatability was quantified using Gwet’s AC1 coefficient with 95% confidence intervals (AC1 = 0.952, 95% CI 0.898-0.994); overall agreement was 95.4%. Dataset IDs correspond to Table 1.

**Abbreviations:** D, derivable; ND, non-derivable; n/N, correct runs out of total; R, run

**Table S3c. ChatGPT-5.2 — run-by-run correctness matrix**

| **Data set** | **Derivability** | **R1** | **R2** | **R3** | **R4** | **R5** | **R6** | **R7** | **R8** | **R9** | **R 10** | **R 11** | **R 12** | **R 13** | **R 14** | **R 15** | **R 16** | **R 17** | **R 18** | **R 19** | **R 20** | **n/N** | |
| --- | --- | --- | --- | --- | --- | --- | --- | --- | --- | --- | --- | --- | --- | --- | --- | --- | --- | --- | --- | --- | --- | --- | --- |
| **1.1** | D | v | v | v | v | v | v | v | v | v | v | v | v | v | X | v | v | v | v | X | v | 18/20 |
| **1.2** | D | v | v | v | v | v | v | v | v | X | v | v | v | v | X | v | v | v | v | v | v | 18/20 |
| **2.1** | D | v | v | v | v | v | v | v | v | v | v | v | v | v | v | v | v | v | v | v | v | 20/20 |
| **2.2** | D | v | v | v | v | v | v | X | v | v | v | v | v | v | v | v | v | v | v | v | v | 19/20 |
| **3.1** | ND | v | v | v | v | v | v | v | v | v | v | v | v | v | v | v | v | v | v | v | v | 20/20 |
| **3.2** | ND | v | v | v | v | v | v | v | v | v | v | v | v | v | v | v | v | v | v | v | v | 20/20 |
| **4.1** | D | v | v | v | v | v | v | v | v | v | v | v | v | v | v | v | v | v | v | v | v | 20/20 |
| **4.2** | D | v | v | v | v | v | v | v | v | v | v | v | v | v | v | v | v | v | v | v | v | 20/20 |
| **5.1** | D | v | v | v | v | v | v | v | v | v | v | v | v | v | v | v | v | v | v | v | v | 20/20 |
| **5.2** | D | v | v | X | v | v | v | v | v | v | v | v | v | v | v | v | v | v | v | v | v | 19/20 |
| **6.1** | ND | v | v | v | v | v | v | v | v | v | v | v | v | v | v | v | v | v | v | v | v | 20/20 |
| **6.2** | ND | v | v | v | v | v | v | v | v | v | v | v | v | v | v | v | v | v | v | v | v | 20/20 |
| **7.1** | D | v | v | v | v | v | v | v | v | v | v | v | v | v | v | v | v | v | v | v | v | 20/20 |
| **7.2** | D | v | v | v | v | v | v | v | v | v | v | v | v | v | v | v | v | v | v | v | v | 20/20 |
| **8.1** | D | X | v | v | X | v | v | X | X | X | v | v | v | X | v | v | v | v | v | v | v | 14/20 |
| **8.2** | ND | v | v | v | v | v | v | v | v | v | v | v | v | v | v | v | v | v | v | v | v | 20/20 |

**Note:** This table presents run-by-run correctness for ChatGPT-5.2 across 20 repeated runs on the full 16-dataset corpus. Each cell denotes run-level correctness, where v indicates a correct result and X an incorrect result. Correctness definitions are identical to those in Table S3b. Overall repeatability was quantified using Gwet’s AC1 coefficient with 95% confidence intervals (AC1 = 0.931, 95% CI 0.847-0.987); overall agreement was 93.6%. Dataset IDs correspond to Table 1.

**Abbreviations:** D, derivable; ND, non-derivable; n/N, correct runs out of total; R, run

**Table S3d. Claude Opus 4.5 — run-by-run correctness matrix**

| **Dataset** | **Derivability** | **R1** | **R2** | **R3** | **R4** | **R5** | **R6** | **R7** | **R8** | **R9** | **R 10** | **R 11** | **R 12** | **R 13** | **R 14** | **R 15** | **R 16** | **R 17** | **R 18** | **R 19** | **R 20** | **n/N** |
| --- | --- | --- | --- | --- | --- | --- | --- | --- | --- | --- | --- | --- | --- | --- | --- | --- | --- | --- | --- | --- | --- | --- |
| **1.1** | D | v | v | v | v | X | v | v | v | X | v | X | v | v | v | v | v | v | v | v | v | 17/20 |
| **1.2** | D | v | v | v | v | v | v | v | v | v | v | v | v | v | v | v | v | v | v | v | v | 20/20 |
| **2.1** | D | X | v | v | v | v | v | v | X | v | v | v | v | v | v | v | X | v | v | v | v | 17/20 |
| **2.2** | D | v | v | v | v | v | v | v | v | v | v | v | v | v | v | v | v | v | v | v | v | 20/20 |
| **3.1** | ND | v | v | v | v | v | v | v | v | v | v | v | v | v | v | v | v | v | v | v | v | 20/20 |
| **3.2** | ND | v | v | v | v | v | v | v | v | v | v | v | v | v | v | v | v | v | v | v | v | 20/20 |
| **4.1** | D | v | v | v | v | v | v | v | v | v | v | v | v | v | v | v | v | v | v | v | v | 20/20 |
| **4.2** | D | v | v | v | v | v | v | v | v | v | v | v | v | v | v | v | v | v | v | v | v | 20/20 |
| **5.1** | D | v | v | v | v | v | v | v | v | v | v | v | v | v | v | v | v | v | v | v | v | 20/20 |
| **5.2** | D | v | v | v | v | v | v | v | v | v | v | v | v | v | v | v | v | v | v | v | v | 20/20 |
| **6.1** | ND | v | v | v | v | v | v | v | v | v | v | v | X | v | v | v | v | v | v | v | v | 19/20 |
| **6.2** | ND | v | v | v | v | v | v | v | v | v | v | v | v | v | v | v | v | v | v | v | v | 20/20 |
| **7.1** | D | v | v | v | v | v | v | v | v | v | v | v | v | v | v | v | v | v | v | v | v | 20/20 |
| **7.2** | D | v | v | v | v | v | v | v | v | v | v | v | v | v | v | v | v | v | v | v | v | 20/20 |
| **8.1** | D | v | v | v | v | v | v | v | v | v | v | v | v | v | v | v | v | v | v | v | v | 20/20 |
| **8.2** | ND | v | v | v | v | v | v | v | v | v | v | v | v | v | v | v | v | v | v | v | v | 20/20 |

**Note:** This table presents run-by-run correctness for Claude Opus 4.5 across 20 repeated runs on the full 16-dataset corpus. Each cell denotes run-level correctness, where v indicates a correct result and X an incorrect result. Correctness definitions are identical to those in Table S3b. Overall repeatability was quantified using Gwet’s AC1 coefficient with 95% confidence intervals (AC1 = 0.958, 95% CI 0.900-1.000); overall agreement was 96.0%. Dataset IDs correspond to Table 1.

**Abbreviations:** D, derivable; ND, non-derivable; n/N, correct runs out of total; R, run

**Table S3e. Gemini 3 Pro — run-by-run correctness matrix**

| **Dataset** | **Derivability** | **R 1** | **R 2** | **R 3** | **R 4** | **R 5** | **R 6** | **R 7** | **R 8** | **R 9** | **R 10** | **R 11** | **R 12** | **R 13** | **R 14** | **R 15** | **R 16** | **R 17** | **R 18** | **R 19** | **R 20** | **n/N** |
| --- | --- | --- | --- | --- | --- | --- | --- | --- | --- | --- | --- | --- | --- | --- | --- | --- | --- | --- | --- | --- | --- | --- |
| **1.1** | D | X | v | v | v | v | X | v | v | v | v | v | v | v | v | v | v | v | X | X | v | 16/20 |
| **1.2** | D | X | X | v | v | X | X | X | X | X | X | X | v | v | v | X | X | v | X | X | v | 7/20 |
| **2.1** | D | v | v | v | v | v | v | v | v | v | v | v | v | v | v | v | v | v | v | v | v | 20/20 |
| **2.2** | D | v | v | v | v | v | v | v | v | v | v | v | v | v | v | v | v | v | v | v | v | 20/20 |
| **3.1** | ND | v | v | v | v | v | v | v | v | v | v | v | v | v | v | v | v | v | v | v | v | 20/20 |
| **3.2** | ND | v | v | v | v | v | v | v | v | v | v | v | v | v | v | v | v | v | v | v | v | 20/20 |
| **4.1** | D | v | v | v | v | v | v | v | v | v | v | v | v | v | v | v | v | v | v | v | v | 20/20 |
| **4.2** | D | v | v | v | v | v | v | v | v | v | v | v | v | v | v | v | v | v | v | v | v | 20/20 |
| **5.1** | D | v | v | v | v | v | v | v | v | v | v | v | v | v | v | v | v | v | v | v | v | 20/20 |
| **5.2** | D | v | v | v | v | v | v | v | X | v | X | v | v | v | v | v | v | v | v | v | v | 18/20 |
| **6.1** | ND | v | v | v | v | v | v | v | v | v | v | v | v | v | v | v | v | v | v | v | v | 20/20 |
| **6.2** | ND | v | v | v | v | v | v | v | v | v | v | v | v | v | v | v | v | v | v | v | v | 20/20 |
| **7.1** | D | v | v | v | v | v | v | v | v | v | v | v | v | v | v | v | v | v | v | v | v | 20/20 |
| **7.2** | D | v | v | v | v | v | v | v | v | v | v | v | v | v | v | v | v | v | v | v | v | 20/20 |
| **8.1** | D | v | v | v | v | v | v | v | v | v | v | v | v | v | v | v | v | v | v | v | v | 20/20 |
| **8.2** | ND | v | v | v | v | v | v | v | v | v | v | v | v | v | v | v | v | v | v | v | v | 20/20 |

**Note:** This table presents run-by-run correctness for Gemini 3 Pro across 20 repeated runs on the full 16-dataset corpus. Each cell denotes run-level correctness, where v indicates a correct result and X an incorrect result. Correctness definitions are identical to those in Table S3b. Overall repeatability was quantified using Gwet’s AC1 coefficient with 95% confidence intervals (AC1 = 0.929, 95% CI 0.817-1.000); overall agreement was 93.7%. Dataset IDs correspond to Table 1.

**Abbreviations:** D, derivable; ND, non-derivable; n/N, correct runs out of total; R, run

**Table S3f. Human extraction — inter-operator correctness matrix**

| **Dataset ID** | **Derivability** | **OP 1** | **OP 2** | **OP 3** | **OP 4** | **n/N correct** |
| --- | --- | --- | --- | --- | --- | --- |
| **1.1** | D | X | X | v | v | **2/4** |
| **1.2** | D | X | X | v | v | **2/4** |
| **2.1** | D | X | X | X | v | **1/4** |
| **2.2** | D | X | X | X | X | **0/4** |
| **3.1** | ND | X | X | X | v | **1/4** |
| **3.2** | ND | v | v | v | v | **4/4** |
| **4.1** | D | v | v | v | v | **4/4** |
| **4.2** | D | v | v | v | v | **4/4** |
| **5.1** | D | X | X | X | X | **0/4** |
| **5.2** | D | X | X | X | v | **1/4** |
| **6.1** | ND | v | v | v | v | **4/4** |
| **6.2** | ND | v | v | v | v | **4/4** |
| **7.1** | D | v | v | v | v | **4/4** |
| **7.2** | D | v | v | v | v | **4/4** |
| **8.1** | D | X | X | X | v | **1/4** |
| **8.2** | ND | v | v | v | v | **4/4** |

**Note:** This table shows inter-operator correctness across 4 independent clinical raters, each extracting all 16 datasets once without adjudication. Each cell denotes correctness, where v indicates a correct result and X an incorrect result. Correctness definitions are identical to those in Table S3b. Gwet’s AC1 reflects between-rater agreement and is shown for contextual comparison only; it is not directly comparable to within-system repeatability across repeated automated runs. Inter-operator agreement, quantified using Gwet’s AC1 coefficient with 95% confidence intervals, was 0.608 (95% CI 0.319-0.876), with an overall agreement of 79.2%. Dataset IDs correspond to Table 1.

**Abbreviations:** D, derivable; ND, non-derivable; n/N, correct ratings out of total; OP, operator

**Supplementary Tables S4. Derived diagnostic metric fidelity**

**Table S4a. Maximum absolute deviation (pp) — overview by dataset and system**

| **Dataset** | **MedNuggetizer** | **ChatGPT-5.2** | **Claude Opus 4.5** | **Gemini 3 Pro** |
| --- | --- | --- | --- | --- |
| **Max deviation (pp, all metrics)** | **across 20 runs** | **across 20 runs** | **across 20 runs** | **across 20 runs** |
| **Batista [13] — Uromonitor** | 0 | 10.6 pp | 10.6 pp | 10.6 pp |
| **Batista [13] — Cytology** | 25.0 pp | 25.0 pp | 0 | 25.0 pp |
| **Sieverink [14] — Uromonitor** | 0 | 0 | 0 | 0 |
| **Sieverink [14] — Cytology** | 0 | 0 | 0 | 0 |
| **Rabien [16] — Uromonitor** | 0 | 0 | 0 | 0 |
| **Rabien [16] — Cytology** | 0 | 0 | 0 | 0 |
| **Wolff[17] — Uromonitor** | 0 | 0 | 0 | 0 |
| **Wolff[17] — Cytology** | 0 | 0 | 0 | 0 |
| **Ramos[19] — Uromonitor** | 0 | 0 | 0 | 0 |
| **Ramos[19] — Cytology** | 0 | 0 | 0 | 0 |
| **Azawi[20] — Uromonitor** | 0 | 0 | 0 | 0 |

**Note:** Values in the table represent the maximum absolute deviation in any derived diagnostic metric relative to the benchmark-derived value across 20 repeated runs per dataset. Zero indicates exact metric agreement in every run. The median absolute deviation was 0.00 pp for all systems.

**Abbreviations:** pp, percentage points

**Table S4b. Maximum absolute deviation (pp) — per metric, per system**

| | **MedNuggetizer — Max deviation (pp)** | **Sens** | **Spec** | **PPV** | **NPV** | **Acc** | | --- | --- | --- | --- | --- | --- | | **Batista [13] — Uromonitor** | 0 | 0 | 0 | 0 | 0 | | **Batista [13] — Cytology** | 14.3 | 3.5 | 25.0 | 0.3 | 3.7 | | **Sieverink [14] — Uromonitor** | 0 | 0 | 0 | 0 | 0 | | **Sieverink [14] — Cytology** | 0 | 0 | 0 | 0 | 0 | | **Rabien [16] — Uromonitor** | 0 | 0 | 0 | 0 | 0 | | **Rabien [16] — Cytology** | 0 | 0 | 0 | 0 | 0 | | **Wolff[17] — Uromonitor** | 0 | 0 | 0 | 0 | 0 | | **Wolff[17] — Cytology** | 0 | 0 | 0 | 0 | 0 | | **Ramos[19] — Uromonitor** | 0 | 0 | 0 | 0 | 0 | | **Ramos[19] — Cytology** | 0 | 0 | 0 | 0 | 0 | | **Azawi[20] — Uromonitor** | 0 | 0 | 0 | 0 | 0 | |  | | **ChatGPT-5.2**  **— Max deviation (pp)** | **Sens** | **Spec** | **PPV** | **NPV** | **Acc** | | --- | --- | --- | --- | --- | --- | | **Batista [13] — Uromonitor** | 10.6 | 1.9 | 6.0 | 6.5 | 3.4 | | **Batista [13] — Cytology** | 14.3 | 3.5 | 25.0 | 0.3 | 3.7 | | **Sieverink [14] — Uromonitor** | 0 | 0 | 0 | 0 | 0 | | **Sieverink [14] — Cytology** | 0 | 0 | 0 | 0 | 0 | | **Rabien [16] — Uromonitor** | 0 | 0 | 0 | 0 | 0 | | **Rabien [16] — Cytology** | 0 | 0 | 0 | 0 | 0 | | **Wolff[17] — Uromonitor** | 0 | 0 | 0 | 0 | 0 | | **Wolff[17] — Cytology** | 0 | 0 | 0 | 0 | 0 | | **Ramos[19] — Uromonitor** | 0 | 0 | 0 | 0 | 0 | | **Ramos[19] — Cytology** | 0 | 0 | 0 | 0 | 0 | | **Azawi[20] — Uromonitor** | 0 | 0 | 0 | 0 | 0 | |
| --- | --- | --- | --- | --- | --- | --- | --- | --- | --- | --- | --- | --- | --- | --- | --- | --- | --- | --- | --- | --- | --- | --- | --- | --- | --- | --- | --- | --- | --- | --- | --- | --- | --- | --- | --- | --- | --- | --- | --- | --- | --- | --- | --- | --- | --- | --- | --- | --- | --- | --- | --- | --- | --- | --- | --- | --- | --- | --- | --- | --- | --- | --- | --- | --- | --- | --- | --- | --- | --- | --- | --- | --- | --- | --- | --- | --- | --- | --- | --- | --- | --- | --- | --- | --- | --- | --- | --- | --- | --- | --- | --- | --- | --- | --- | --- | --- | --- | --- | --- | --- | --- | --- | --- | --- | --- | --- | --- | --- | --- | --- | --- | --- | --- | --- | --- | --- | --- | --- | --- | --- | --- | --- | --- | --- | --- | --- | --- | --- | --- | --- | --- | --- | --- | --- | --- | --- | --- | --- | --- | --- | --- | --- | --- | --- | --- | --- |

| | **Claude Opus 4.5 — Max deviation (pp)** | **Sens** | **Spec** | **PPV** | **NPV** | **Acc** | | --- | --- | --- | --- | --- | --- | | **Batista [13] — Uromonitor** | 10.6 | 1.9 | 6.0 | 6.5 | 3.4 | | **Batista [13] — Cytology** | 0 | 0 | 0 | 0 | 0 | | **Sieverink [14] — Uromonitor** | 0 | 0 | 0 | 0 | 0 | | **Sieverink [14] — Cytology** | 0 | 0 | 0 | 0 | 0 | | **Rabien [16] — Uromonitor** | 0 | 0 | 0 | 0 | 0 | | **Rabien [16] — Cytology** | 0 | 0 | 0 | 0 | 0 | | **Wolff[17] — Uromonitor** | 0 | 0 | 0 | 0 | 0 | | **Wolff[17] — Cytology** | 0 | 0 | 0 | 0 | 0 | | **Ramos[19] — Uromonitor** | 0 | 0 | 0 | 0 | 0 | | **Ramos[19] — Cytology** | 0 | 0 | 0 | 0 | 0 | | **Azawi[20] — Uromonitor** | 0 | 0 | 0 | 0 | 0 | |  | | **Gemini 3 Pro — Max deviation (pp)** | **Sens** | **Spec** | **PPV** | **NPV** | **Acc** | | --- | --- | --- | --- | --- | --- | | **Batista [13] — Uromonitor** | 10.6 | 1.9 | 6.0 | 6.5 | 3.4 | | **Batista [13] — Cytology** | 14.3 | 3.5 | 25.0 | 0.3 | 3.7 | | **Sieverink [14] — Uromonitor** | 0 | 0 | 0 | 0 | 0 | | **Sieverink [14] — Cytology** | 0 | 0 | 0 | 0 | 0 | | **Rabien [16] — Uromonitor** | 0 | 0 | 0 | 0 | 0 | | **Rabien [16] — Cytology** | 0 | 0 | 0 | 0 | 0 | | **Wolff[17] — Uromonitor** | 0 | 0 | 0 | 0 | 0 | | **Wolff[17] — Cytology** | 0 | 0 | 0 | 0 | 0 | | **Ramos[19] — Uromonitor** | 0 | 0 | 0 | 0 | 0 | | **Ramos[19] — Cytology** | 0 | 0 | 0 | 0 | 0 | | **Azawi[20] — Uromonitor** | 0 | 0 | 0 | 0 | 0 | |
| --- | --- | --- | --- | --- | --- | --- | --- | --- | --- | --- | --- | --- | --- | --- | --- | --- | --- | --- | --- | --- | --- | --- | --- | --- | --- | --- | --- | --- | --- | --- | --- | --- | --- | --- | --- | --- | --- | --- | --- | --- | --- | --- | --- | --- | --- | --- | --- | --- | --- | --- | --- | --- | --- | --- | --- | --- | --- | --- | --- | --- | --- | --- | --- | --- | --- | --- | --- | --- | --- | --- | --- | --- | --- | --- | --- | --- | --- | --- | --- | --- | --- | --- | --- | --- | --- | --- | --- | --- | --- | --- | --- | --- | --- | --- | --- | --- | --- | --- | --- | --- | --- | --- | --- | --- | --- | --- | --- | --- | --- | --- | --- | --- | --- | --- | --- | --- | --- | --- | --- | --- | --- | --- | --- | --- | --- | --- | --- | --- | --- | --- | --- | --- | --- | --- | --- | --- | --- | --- | --- | --- | --- | --- | --- | --- | --- | --- |

**Note:** This table summarizes cross-system maximum absolute deviations in derived diagnostic metrics across the 11 benchmark-derivable datasets. Values denote the largest observed deviation from the benchmark-derived metric across all runs for each system. Zero indicates no deviation in any run.

**Abbreviations:** Acc, accuracy; NPV, negative predictive value; PPV, positive predictive value; pp, percentage points; Sens, sensitivity; Spec, specificity

**Supplementary Tables S5. Per-run execution time distributions**

**Table S5a. Per-run full-corpus execution times — all automated systems**

| **Run** | **MedNuggetizer (s)** | **ChatGPT-5.2 (s)** | **Claude Opus 4.5 (s)** | **Gemini 3 Pro (s)** |
| --- | --- | --- | --- | --- |
| **1** | 732 | 385 | 465 | 889 |
| **2** | 593 | 391 | 421 | 1069 |
| **3** | 716 | 278 | 619 | 989 |
| **4** | 733 | 835 | 467 | 963 |
| **5** | 742 | 1024 | 368 | 912 |
| **6** | 729 | 907 | 343 | 938 |
| **7** | 806 | 1310 | 375 | 794 |
| **8** | 639 | 817 | 335 | 869 |
| **9** | 769 | 1018 | 402 | 520 |
| **10** | 718 | 798 | 429 | 827 |
| **11** | 620 | 639 | 400 | 400 |
| **12** | 738 | 715 | 406 | 514 |
| **13** | 729 | 944 | 434 | 1051 |
| **14** | 725 | 807 | 445 | 302 |
| **15** | 760 | 914 | 261 | 214 |
| **16** | 697 | 814 | 574 | 261 |
| **17** | 682 | 859 | 358 | 735 |
| **18** | 735 | 977 | 359 | 715 |
| **19** | 935 | 1027 | 491 | 662 |
| **20** | 844 | 847 | 317 | 565 |
| **Median [IQR]** | **730 [711–746]** | **841 [777–952]** | **404 [359–450]** | **764 [518–918]** |

**Note:** This table reports the full-corpus execution time per run for each automated system. Execution time was defined as the interval from prompt submission or pipeline initiation to delivery of the first complete output, covering all 16 datasets in one run. Medians and interquartile ranges are computed across 20 runs per system.

**Abbreviations:** IQR, interquartile range; s, seconds

**Table S5b. Human extraction — per-operator full-corpus execution time**

| **Operator** | **Datasets extracted** | **Total time (s)** | **Total time (min)** |
| --- | --- | --- | --- |
| **1** | 16 | 2482 | 41.4 |
| **2** | 16 | 2543 | 42.4 |
| **3** | 16 | 1685 | 28.1 |
| **4** | 16 | 8708 | 145.1 |
| **Median [IQR]** | — | **2513 [2284–4080]** | **41.9** |

**Note:** This table reports the total execution time for each of 4 independent clinical raters extracting all 16 datasets once. Variability between operators reflects differences in individual working pace rather than extraction accuracy.

**Abbreviations:** IQR, interquartile range; min, minutes; s, seconds

**Supplementary Tables S6. Exploratory performance of large language models under an optimized and shared prompting condition**

**Table S6a. Exploratory performance summary under a shared optimized prompt**

**(n = 3 runs per system)**

| **Metric** | **ChatGPT-5.2** | **Claude Opus 4.5** | **Gemini 3 Pro** |
| --- | --- | --- | --- |
| **Repeated runs (n)** | 3 | 3 | 3 |
| **Derivable datasets: correct / 33** | 33/33 | 33/33 | 33/33 |
| **Derivable correctness (%)** | 100.0 | 100.0 | 100.0 |
| **Absent non-derivable dataset (8.2): correct / 3** | 3/3 | 3/3 | 3/3 |
| **Ambiguous non-derivable: reconstruction attempted, n/12** | 6/12 | 9/12 | 7/12 |
| **Ambiguous non-derivable: non-derivable declared, n/12** | 6/12 | 3/12 | 5/12 |
| **Ambiguous non-derivable: documented inconsistency, n** | 0 | 2 | 3 |
| **Median duration per dataset-run, s** | 373 | 21 | 82 |

**Note:** Exploratory runs were conducted under a shared optimized prompt that permitted rule-based reconstruction from reported metrics, in contrast to the locked primary prompt, which restricted extraction to explicitly reported absolute numbers only. Each system completed 3 independent runs across the full 16-dataset corpus. All correct derivable extractions were based on directly reported absolute numbers; no system required metric-based calculation for any derivable dataset.

**Abbreviations:** n, number; s, seconds

**Table S6b. Exploratory per-dataset outcomes under a shared optimized prompt**

| **Dataset ID** | **Diagnostic test** | **Category** | **ChatGPT-5.2** | **Claude Opus 4.5** | **Gemini 3 Pro** |
| --- | --- | --- | --- | --- | --- |
| **1.1** | Uromonitor | Derivable | 3/3 correct | 3/3 correct | 3/3 correct |
| **1.2** | Urine cytology | Derivable | 3/3 correct | 3/3 correct | 3/3 correct |
| **2.1** | Uromonitor | Derivable | 3/3 correct | 3/3 correct | 3/3 correct |
| **2.2** | Urine cytology | Derivable | 3/3 correct | 3/3 correct | 3/3 correct |
| **3.1** | Uromonitor | *Ambiguous ND* | Recon (3/3) | Recon (3/3)a | Recon (3/3)a |
| **3.2** | Urine cytology | *Ambiguous ND* | Recon (3/3) | Recon (3/3) | Recon (3/3)a |
| **4.1** | Uromonitor | Derivable | 3/3 correct | 3/3 correct | 3/3 correct |
| **4.2** | Urine cytology | Derivable | 3/3 correct | 3/3 correct | 3/3 correct |
| **5.1** | Uromonitor | Derivable | 3/3 correct | 3/3 correct | 3/3 correct |
| **5.2** | Urine cytology | Derivable | 3/3 correct | 3/3 correct | 3/3 correct |
| **6.1** | Uromonitor | *Ambiguous ND* | ND declared (3/3) | Recon (3/3)a | Recon (1/3)a; ND declared (2/3) |
| **6.2** | Urine cytology | *Ambiguous ND* | ND declared (3/3) | ND declared (3/3) | ND declared (3/3) |
| **7.1** | Uromonitor | Derivable | 3/3 correct | 3/3 correct | 3/3 correct |
| **7.2** | Urine cytology | Derivable | 3/3 correct | 3/3 correct | 3/3 correct |
| **8.1** | Uromonitor | Derivable | 3/3 correct | 3/3 correct | 3/3 correct |
| **8.2** | Urine cytology | *Absent ND* | ND declared (3/3) | ND declared (3/3) | ND declared (3/3) |

a Reconstruction flagged as internally inconsistent in at least one run.

**Note:** Per-dataset outcomes across 3 exploratory runs under the shared optimized prompt. For derivable datasets, a run was scored as correct if all four contingency-table cells exactly matched the adjudicated human benchmark. For ambiguous non-derivable datasets, no gold-standard values exist; outcomes describe whether reconstruction was attempted or non-derivability was declared. For the absent non-derivable dataset (8.2), the only correct outcome was explicit abstention. Dataset IDs correspond to Table 1.

**Abbreviations:** ND, non-derivable; Recon, reconstruction attempted

**Supplementary Tables S7.**

**Supplementary Table S7. CHART checklist mapping**

| **CHART item** | **Description** | **Manuscript section / location** |
| --- | --- | --- |
| **1a** | Study identifies evaluation of generative AI systems | Title |
| **1b** | Structured abstract | Abstract (Background, Methods, Results, Conclusions) |
| **2a** | Scientific background and rationale | Introduction, paragraphs 1–3 |
| **2b** | Aims and research questions | Introduction, final paragraph |
| **3a** | Model names and version identifiers | Methods, Section 2.4 |
| **3b** | Open- vs closed-source specification | Methods, Section 2.4 |
| **4a** | Base vs tuned model | Methods, Section 2.4 |
| **4b** | Base model identification | Methods, Section 2.4 |
| **4c** | Description of tuned or novel models | Methods, Section 2.4 (MedNuggetizer) |
| **5a** | Evolution of prompt development | Methods, Section 2.5 |
| **5ai** | Sources of prompts | Methods, Section 2.5 |
| **5aii** | Individuals involved in prompt engineering | Methods, Section 2.5 |
| **5aiii** | Patient/public involvement in prompt design | Not applicable |
| **5b** | Provision of study prompts | Supplementary materials: Prompt development, locking, and exploratory optimization |
| **6a** | Route of access to models | Methods, Section 2.4 |
| **6b** | Dates and locations of queries | Methods, Section 2.5 |
| **6c** | Separate chat sessions | Methods, Section 2.5 |
| **6d** | Availability of model outputs | Supplementary Data, Tables S1–S5 |
| **7a** | Definition of ground truth | Methods, Section 2.2 |
| **7b** | Performance evaluation process | Methods, Sections 2.8–2.9 |
| **7bi** | Evaluators and characteristics | Methods, Section 2.7 |
| **7bii** | Patient/public involvement in evaluation | Not applicable |
| **7biii** | Blinding of evaluators | Methods, Section 2.7 |
| **8** | Sample size determination | Methods, Section 2.10 |
| **9a** | Statistical analysis methods | Methods, Section 2.9 |
| **9ai** | Performance metrics | Methods, Section 2.8 |
| **10a** | Alignment with ground truth | Results, Sections 3.2–3.4 |
| **10b** | Nature of deviations | Results, Sections 3.3–3.4; Supplementary Table S2 |
| **10c** | Harmful or misleading outputs | Results, Section 3.4 |
| **11a** | Interpretation in context of evidence | Discussion, paragraphs 1–2 |
| **11b** | Strengths and limitations | Discussion |
| **11c** | Implications for practice and research | Discussion, final paragraph |
| **12a** | Declarations | Declarations (Competing interests) |
| **12b** | Funding | Declarations (Funding) |
| **12c** | Ethics approval | Methods, Section 2.11, Declarations (Ethics approval and consent to participate) |
| **12ci** | Data privacy safeguards | Methods, Section 2.11 |
| **12cii** | Copyright/licensing | Methods, Section 2.11 |
| **12d** | Study protocol | Methods, Section 2.1; Reference to medRxiv protocol [12] |
| **12e** | Data availability | Declarations (Availability of data and materials) |

**Note:** Mapping of all items from the Chatbot Assessment Reporting Tool (CHART) checklist [9] to the corresponding sections and pages of this manuscript and its supplementary material.
